# Supplementary material for: An enantioselective synthetic pathway towards plakortonesDedicated to Professor Thomas C. W. Mak on the occasion of his 65th birthday.Electronic supplementary information (ESI) available: selected analytical data for compounds 2, 3 and 4 and crystal data of compounds 11, 19 and 24. See http://www.rsc.org/suppdata/cc/b2/b205924j/
Source: Royal Society of Chemistry journal article supplement (doi:10.1039/b205924j), 2002-08-21
Supplement: b205924j.doc [file b205924j.doc]

**Electronic Supplementary Information (ESI)**

Selected data for Compound **2**: []d20 -107o (*c* 1.0, CHCl3), H (300 MHz, CDCl3) 1.02 (t, *J* = 7.5 Hz, 3H), 1.77-1.89 (m, 1H), 2.01-2.13 (m, 1H), 2.73 (d, *J* = 18.6 Hz, 1H), 2.84 (dd, *J* = 18.6, 5.4 Hz, 1H), 4.01 (dd, *J* = 11.1, 1.2 Hz, 1H), 4.28 (dd, *J* = 11.1, 3.6 Hz, 1H), 4.62 (d, *J* = 5.4 Hz, 1H), 5.54 (dd, *J* = 3.6, 1.2 Hz, 1H), 7.62 (d, *J* = 8.7 Hz, 2H), 7.89 (d, *J* = 8.7 Hz, 2H). Compound **3**: []d20 29.4o (*c* 0.2, CHCl3), H (300 MHz, CDCl3) 1.03 (t, *J* = 7.5 Hz, 3H), 1.80-1.92 (m, 1H), 2.00-2.12 (m, 1H), 2.76 (dd, *J* = 18.9, 1.8 Hz, 1H), 2.87 (dd, *J* = 18.9, 6.3 Hz, 1H), 4.00 (dd, *J* = 10.5, 5.1 Hz, 1H), 4.12 (dd, *J* = 10.5, 5.1 Hz, 1H), 4.44 (dd, *J* = 6.3, 1.8 Hz, 1H), 5.34 (t, *J* = 5.1 Hz, 1H), 7.71 (d, *J* = 8.7 Hz, 2H), 7.91 (d, *J* = 8.7 Hz, 2H). Compound **4**: []d20 0.67o (*c* 1.3, CHCl3), H (300 MHz, CDCl3) 0.88 (t, J = 7.5 Hz, 3H), 0.99 (t, J = 7.4 Hz, 3H), 1.59-1.87 (m, 2H), 2.19 (d, *J* = 14.6 Hz, 1H), 2.49 (d, *J* = 14.6 Hz, 1H), 2.70 (dd, *J* = 16.8, 3.7 Hz, 1H), 2.77 (dd, *J* = 16.8, 2.0 Hz, 1H), 4.26 (dd, *J* = 3.7, 2.0 Hz, 1H), 9.51 (s, 1H).

Single-crystal X-ray diffraction data for **11**, **19** and **24** were collected at 293K on a Siemens SMART CCD diffractometer using Mo-*K* radiation ( = 71073 Å). Crystal data for **11**: C15H28O5Si, *M* = 316.46, orthorhombic, space group *P*212121, *a* = 7.6575(9), *b* = 10.613(1), *c* = 22.158(3) Å, *Z* = 4, *Dc* = 1.167 g cm–3, µ(Mo-*K*) = 0.147 mm–1. Least-squares refinement based on 4321 reflections with *I* > 2(*I*) and 190 parameters led to *R*1 = 0.0365, *wR*2 = 0.0866 and GOF = 0.964. Flack parameter = 0.0(1). Crystal data for **19**: C15H28O5Si, *M* = 316.46, monoclinic, space group *P*21, *a* = 10.179(2), *b* = 7.430(2), *c* = 13.032(3) Å,  = 105.87(3), *Z* = 2, *Dc* = 1.109 g cm–3, µ(Mo-*K*) = 0.140 mm–1. Two oxygen atoms in the molecule exhibit disorder. Least-squares refinement based on 2698 reflections with *I* > 2(*I*) and 217 parameters led to *R*1 = 0.117, *wR*2 = 0.303 and GOF = 1.33. Flack parameter = 0.7(4). Crystal data for **24**: C16H24O5, *M* = 296.35, orthorhombic, space group *P*212121, *a* = 8.2731(4), *b* = 11.6606(6), *c* = 17.5669(9) Å, *Z* = 4, *Dc* = 1.162 g cm–3, µ(Mo-*K*) = 0.085 mm–1. Least-squares refinement based on 4078 reflections with *I* > 2(*I*) and 191 parameters led to *R*1 = 0.0449, *wR*2 = 0.1079 and GOF = 0.930. Flack parameter = 0.3(1). Though the Flack parameters quoted above are unreliable due to the absence of a heavy atom, the configurations of **11**, **19** and **24** were confirmed in reference to the known stereogenic centre in the enantiopure precursor (+)-2,3-*O*-isopropylidene-D-glyceraldehyde. CCDC reference numbers 188284, 188701 and 188285, respectively. See <http://www.rsc.org/suppdata/cc/b2/b205924j/> for crystallographic data in CIF format.
